# Supplementary material for: Stepwise chelation-etching synthesis of carbon-confined ultrafine SnO2 nanoparticles for stable sodium storage
Source: Royal Society of Chemistry journal article supplement (doi:10.1039/c7cc08959g), 2018-01-01
Supplement: c7cc08959g1.pdf [file c7cc08959g1.pdf]

## Supporting Information

### Stepwise Chelation-Etching Synthesis of Carbon-Confined Ultrafine SnO<sub>2</sub> Nanoparticles for Stable Sodium Storage

Yuanjie Zhang,<sup>a</sup> Jiashen Meng,<sup>a</sup> Xuanpeng Wang,<sup>a</sup> Xiong Liu,<sup>a</sup> Xiaoming Xu,<sup>a</sup> Ziang Liu,<sup>a</sup> Kwadwo Asare Owusu,<sup>a</sup> Congyun Huang,<sup>b</sup> Qi Li<sup>\*a</sup> and Liqiang Mai<sup>\*a</sup>

<sup>a</sup>State Key Laboratory of Advanced Technology for Materials Synthesis and Processing, Wuhan University of Technology, Wuhan 430070, Hubei, China.

<sup>b</sup>School of Materials Science and Engineering, Wuhan University of Technology, Wuhan 430070, Hubei, China.

#### Experimental

##### Preparation of CoSn(OH)<sub>6</sub> nanocubes

1.40 g tin chloride pentahydrate (SnCl<sub>4</sub>·5H<sub>2</sub>O) was dissolved in 20 mL H<sub>2</sub>O to obtain a homogeneous light red solution (named as solution A). 0.9517 g cobalt chloride hexahydrate (CoCl<sub>2</sub>·6H<sub>2</sub>O) and 1.1864 g sodium citrate dihydrate (Na<sub>3</sub>C<sub>6</sub>H<sub>5</sub>O<sub>7</sub>·2H<sub>2</sub>O) were dissolved in 120 mL H<sub>2</sub>O to obtain a homogeneous solution (named as solution B). 1.60 g sodium hydroxide (NaOH) was dissolved in 20 mL H<sub>2</sub>O to obtain a homogeneous solution (named as solution C). Solution A was added into solution B, forming a light pink turbid liquid; then solution C was added dropwise followed by stirring for 1 h. Finally, pink CoSn(OH)<sub>6</sub> powder was obtained after washing and drying in oven at 70 °C for 12 h.

##### Preparation of CoSn(OH)<sub>6</sub>@polydopamine nanocubes

336 mg CoSn(OH)<sub>6</sub> powder and 406.5 mg tris(hydroxymethyl)aminomethane was dissolved in 330 mL H<sub>2</sub>O to obtain a light pink turbid liquid, then diluted hydrochloric acid was added to the light pink CoSn(OH)<sub>6</sub> turbid liquid dropwise until the pH value reached 8.5. 100.8 mg dopamine hydrochloride powder was dissolved in 6 mL H<sub>2</sub>O, forming colorless solution; then it was added to the light pink CoSn(OH)<sub>6</sub> turbid liquid followed by stirring for 24 h. Finally, the greyish-black CoSn(OH)<sub>6</sub>@polydopamine powder was obtained after washing and drying in oven at 70 °C for 12 h.

### **Preparation of CoSnO<sub>3</sub>@NC nanocubes**

The as-prepared CoSn(OH)<sub>6</sub>@polydopamine powder was annealed at 500 °C (3 °C min<sup>-1</sup>) under the nitrogen atmosphere for 1 h. Then, the black CoSnO<sub>3</sub>@NC powder was obtained.

### **Preparation of SnO<sub>2</sub>@NC nanocubes**

75 mg CoSnO<sub>3</sub>@NC composite (0.3mmol, based on the molar of Co) and a certain amount of ethylenediaminetetraacetic acid (EDTA) were added to 70 mL H<sub>2</sub>O and stirred under sonication for 10 min. Then the black turbid liquid was transferred into 100 mL Teflon-lined sealed autoclave and maintained at 120 °C for 12 h. Afterward, the autoclave was cooled down to room temperature naturally and the samples were washed with distilled water 6 times. The final products were dried at 70 °C for 12 h in an oven. SnO<sub>2</sub>@NC-1, SnO<sub>2</sub>@NC-1.2, SnO<sub>2</sub>@NC-1.5, SnO<sub>2</sub>@NC-2 respectively correspond to the product obtained when the additive amount of EDTA is 87.67 mg (0.3 mmol, M<sub>CoSnO<sub>3</sub></sub>:M<sub>EDTA</sub>=1:1), 105.2 mg (0.36 mmol, M<sub>CoSnO<sub>3</sub></sub>:M<sub>EDTA</sub>=1:1.2), 131.5 mg (0.45 mmol, M<sub>CoSnO<sub>3</sub></sub>:M<sub>EDTA</sub>=1:1.5), 175.34 mg (0.6 mmol, M<sub>CoSnO<sub>3</sub></sub>:M<sub>EDTA</sub>=1:2).

### **Characterization**

The crystallographic information of the final products were measured using a Bruker D8 Discover X-ray diffractometer (XRD) equipped with a Cu-K $\alpha$  radiation source; the samples were scanned over a 2 $\theta$  range from 20° to 80° at room temperature. Scanning electron microscope (SEM) images were collected using a JEOL-7100F SEM. Transmission electron microscope (TEM) and high-resolution TEM (HRTEM) images were collected using a JEM-2100F TEM. The Brunauer-Emmett-Teller (BET) specific surface area was calculated from nitrogen adsorption isotherms measured at 77 K using a Tristar-3020 instrument. Energy-dispersive X-ray spectra (EDS) was recorded using an Oxford IE250 system. X-ray photoelectron spectroscopy (XPS) measurements were performed using a VG MultiLab 2000 instrument. Thermogravimetric analysis (TGA) was performed using a Netzsch STA 449 C simultaneous analyzer under an air flow with a temperature ramp of 10 °C min<sup>-1</sup>. Raman spectra was obtained using a Renishaw INVIA micro-Raman spectroscopy system. Fourier transform infrared spectroscopy (FTIR) was recorded using a Thermo

Nicolet Nexus instrument. Inductively coupled plasma atomic emission spectrometry (ICP-AES) was performed using an Optima 4300DV instrument.

### **Electrochemical measurements**

Typical 2016 coin cells were assembled in an argon-filled glovebox with moisture and oxygen concentrations below 1.0 ppm. Sodium foil was used as the counter electrode and a solution of  $\text{NaClO}_4$  (1 M) in EC: DMC = 1:1 (Vol %) with 5 wt.% FEC was used as the electrolyte. The anode was composed of a grinded mixture of 70 wt.% active material, 20 wt.% acetylene black and 10 wt.% carboxymethylcellulose. Copper foil was used as the current collector. Galvanostatic charge/discharge measurements were performed using a multichannel battery testing system (LAND CT2001A). Cyclic voltammograms (CV, 0.01-3 V) and electrochemical impedance spectra (EIS) were collected using an Autolab potentiostat/galvanostat. Specific capacities were calculated based on the mass of active material. The mass loading of each electrode was 1-1.5  $\text{mg cm}^{-2}$ .

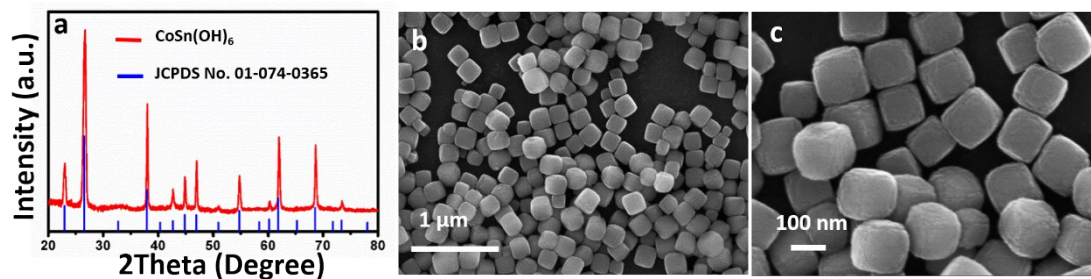

Fig. S1 (a) XRD pattern, (b, c) SEM images of the initial product  $\text{CoSn(OH)}_6$ .

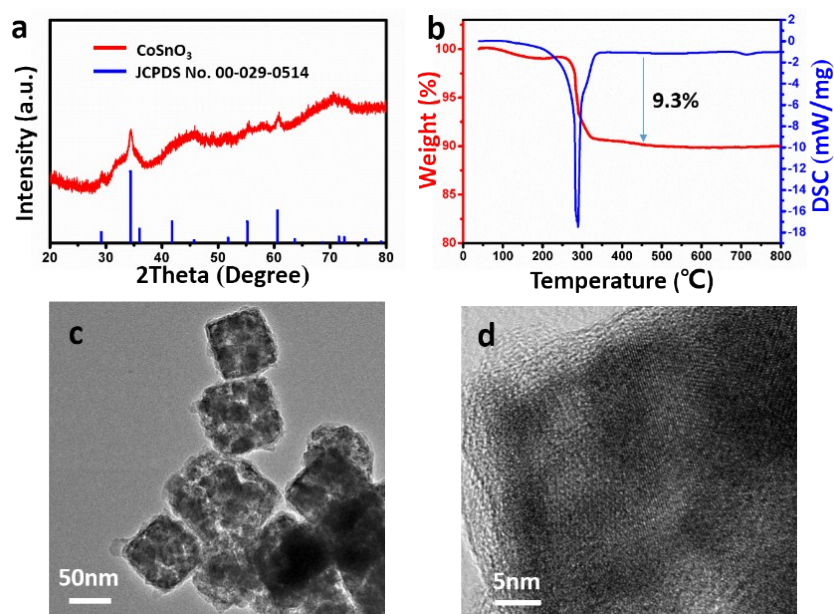

Fig. S2 (a) XRD pattern (b) TG curves and (c, d) TEM images of  $\text{CoSnO}_3@\text{NC}$ .

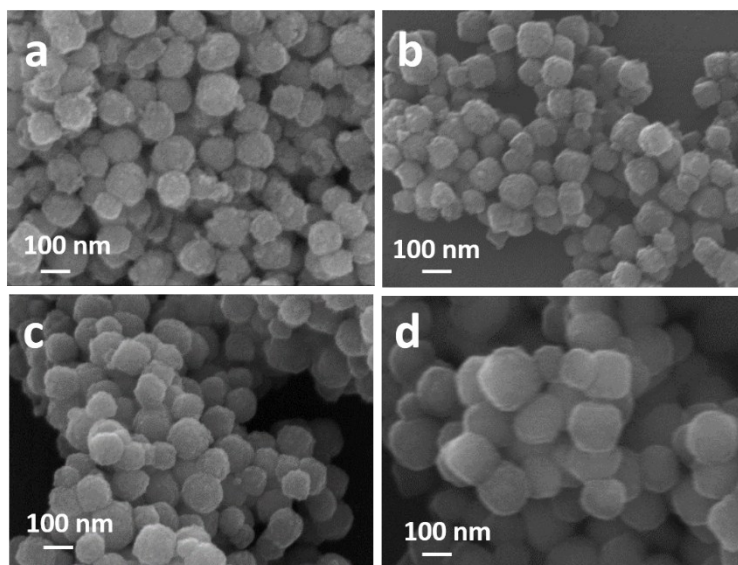

Fig.S3 SEM images of SnO<sub>2</sub>@NC-1 (a), SnO<sub>2</sub>@NC-1.2 (b), SnO<sub>2</sub>@NC-1.5 (c), SnO<sub>2</sub>@NC-2 (d).

**Tab. S1** ICP results of SnO<sub>2</sub>@NC-1.

|    | Gauged molar concentration<br>(mmol g <sup>-1</sup> ) | Ratio<br>(Sn/Co) |
|----|-------------------------------------------------------|------------------|
| Co | 0.143                                                 | 10.3             |
| Sn | 1.478                                                 |                  |

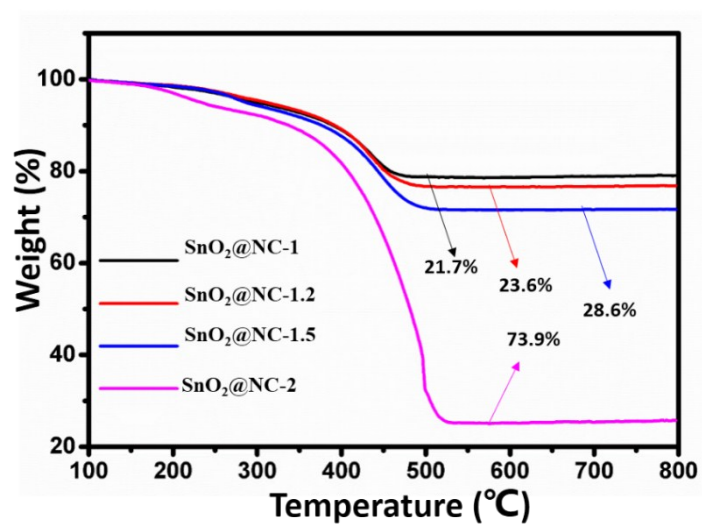

Fig. S4 TG curves of SnO<sub>2</sub>@NC.

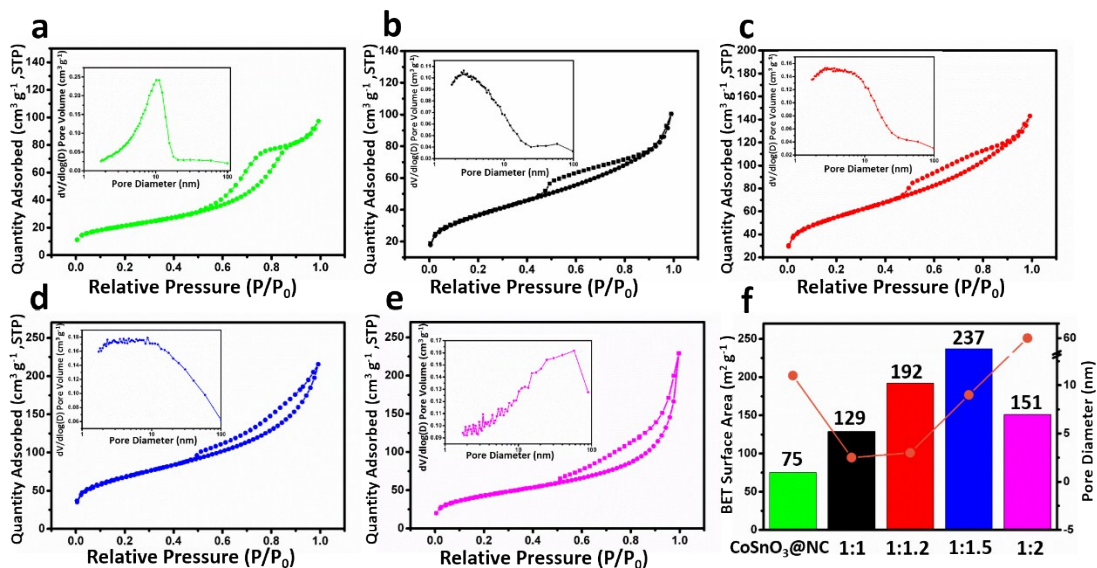

Fig.S5  $\text{N}_2$  adsorption-desorption isotherms of  $\text{CoSnO}_3\text{@NC}$  (a),  $\text{SnO}_2\text{@NC-1}$  (b),  $\text{SnO}_2\text{@NC-1.2}$  (c),  $\text{SnO}_2\text{@NC-1.5}$  (d) and  $\text{SnO}_2\text{@NC-2}$  (e), respectively. The inserted pictures are the corresponding BJH pore size distribution plots; (f) BET specific surface area of  $\text{CoSnO}_3\text{@NC}$  and  $\text{SnO}_2\text{@NC}$  and corresponding most probable distribution of pore diameter.

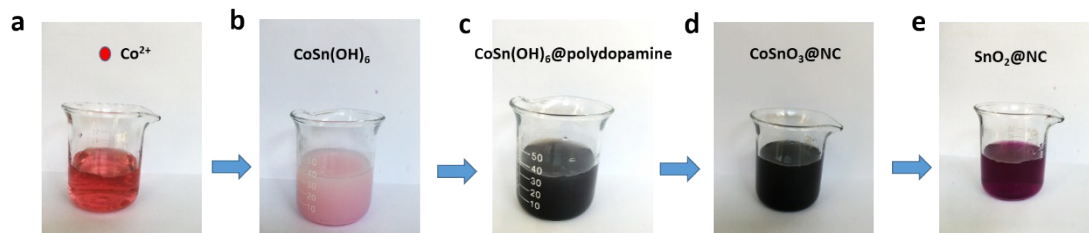

Fig. S6 Digital photo of colour change during the process: (a) aqueous solution after adding all the agents except NaOH; (b) aqueous turbid liquid of as-prepared  $\text{CoSn}(\text{OH})_6$ ; (c) aqueous turbid liquid of  $\text{CoSn}(\text{OH})_6\text{@polydopamine}$ ; (d) aqueous turbid liquid of  $\text{CoSnO}_3\text{@NC}$ ; (e) supernatant after EDTA chelating  $\text{CoSnO}_3\text{@NC}$ .

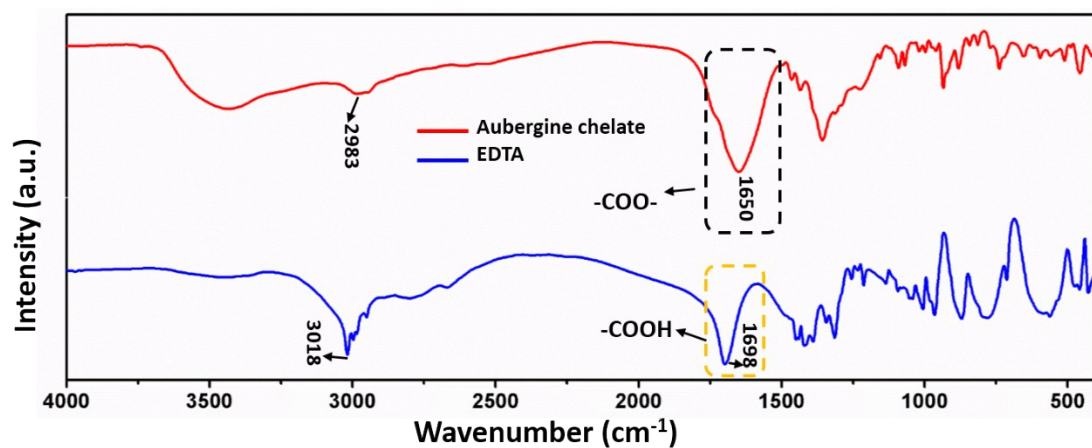

Fig. S7 Fourier transform infrared spectroscopy of EDTA and the aubergine chelate of SnO<sub>2</sub>@NC-1.2 after chelation.

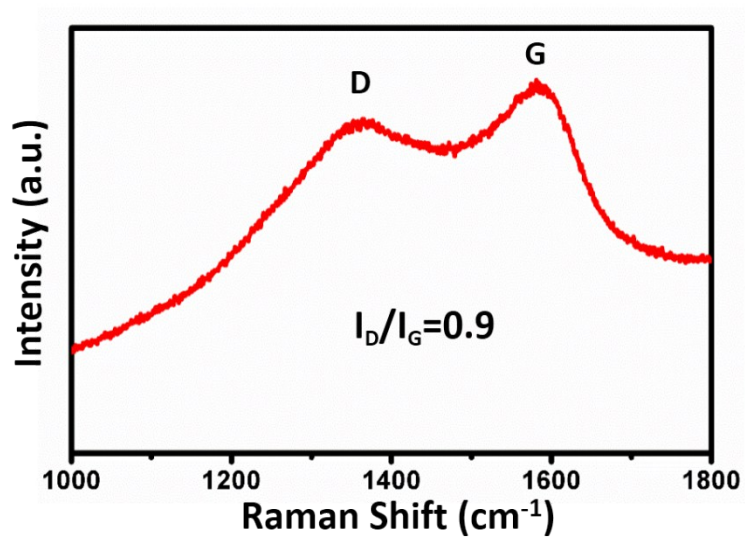

Fig. S8 Raman spectrum of SnO<sub>2</sub>@NC-1.2.

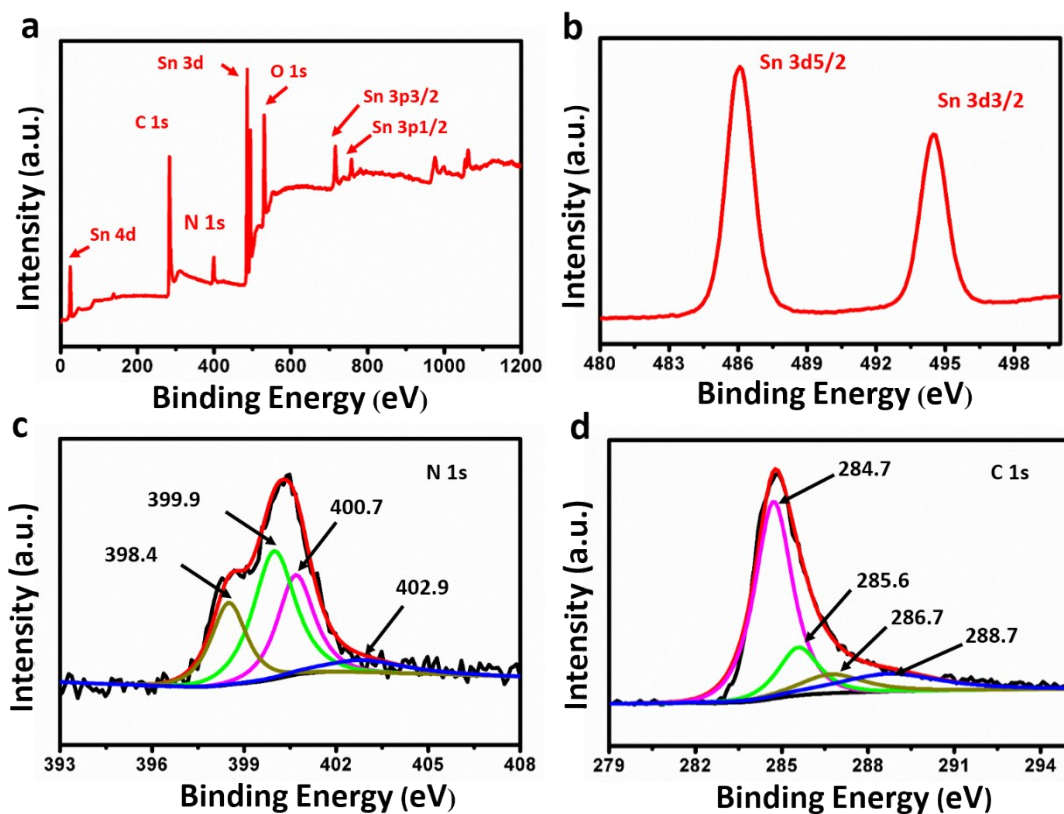

Fig. S9 XPS analysis of SnO<sub>2</sub>@NC-1.2 : (a) the survey spectrum, (b) XPS Sn 3d spectra, (c) high-resolution spectrum of N 1s, (d) C 1s spectrum.

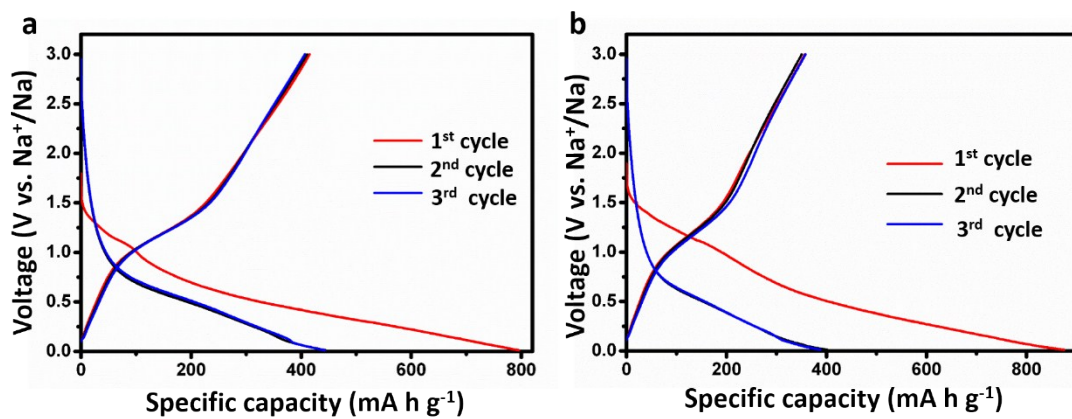

Fig. S10 Charge–discharge profiles of (a) SnO<sub>2</sub>@NC-1 and (b) SnO<sub>2</sub>@NC-1.5 at a current density of 50 mA g<sup>-1</sup> respectively.



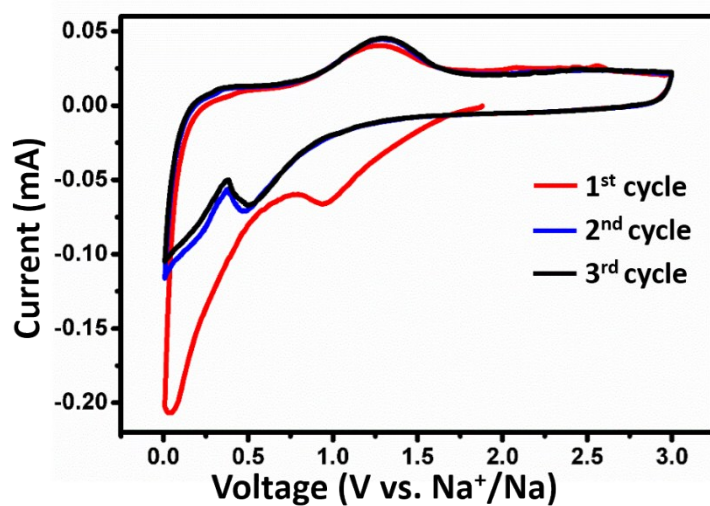

Fig. S11 Cyclic voltammograms at  $0.1 \text{ mV s}^{-1}$  sweep rate of  $\text{SnO}_2@\text{NC-1.2}$  electrode for the first three cycles.

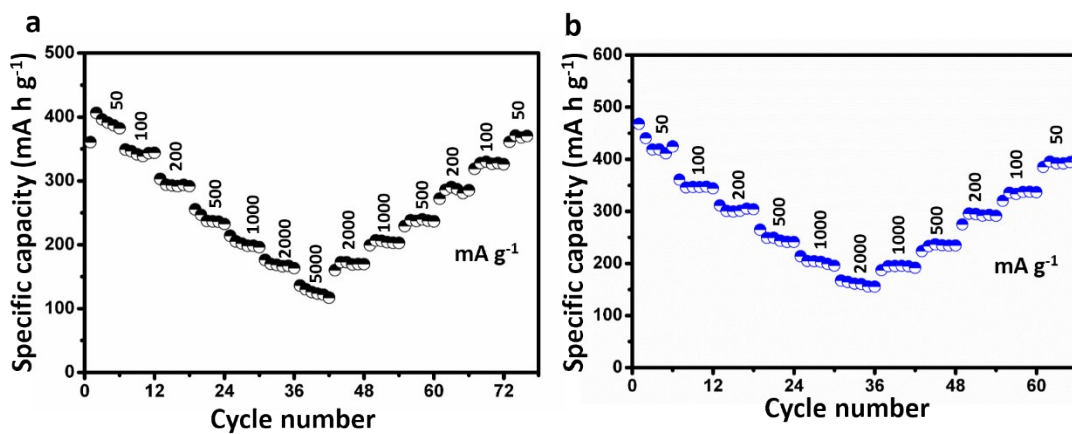

Fig. S12 Rate performance of (a)  $\text{SnO}_2@\text{NC-1}$  and (b)  $\text{SnO}_2@\text{NC-1.5}$  at various current densities, respectively.

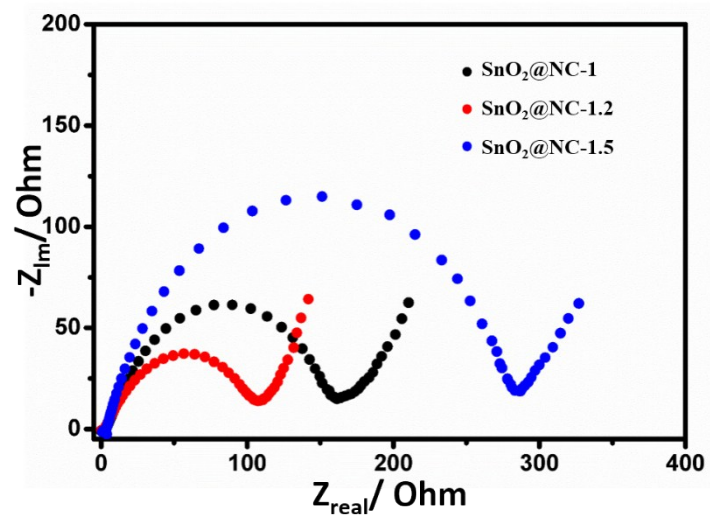

Fig. S13 Nyquist plots of SnO<sub>2</sub>@NC electrode after 80 cycles at a current density of 1000 mA g<sup>-1</sup>.

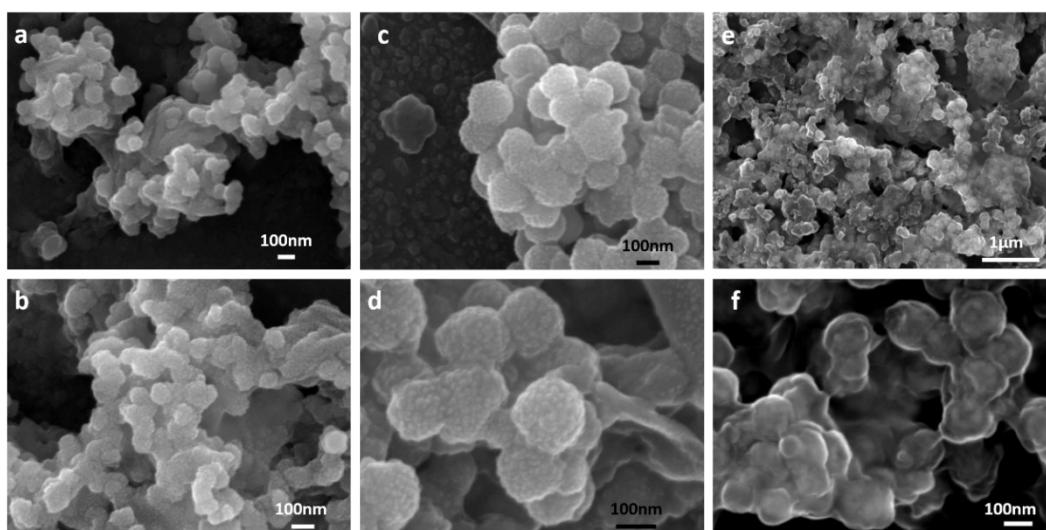

Fig. S14 SEM images of (a, b) SnO<sub>2</sub>@NC-1, (c, d) SnO<sub>2</sub>@NC-1.2 and (e, f) SnO<sub>2</sub>@NC-2 electrode after 80 cycles at a current density of 1000 mA g<sup>-1</sup>.

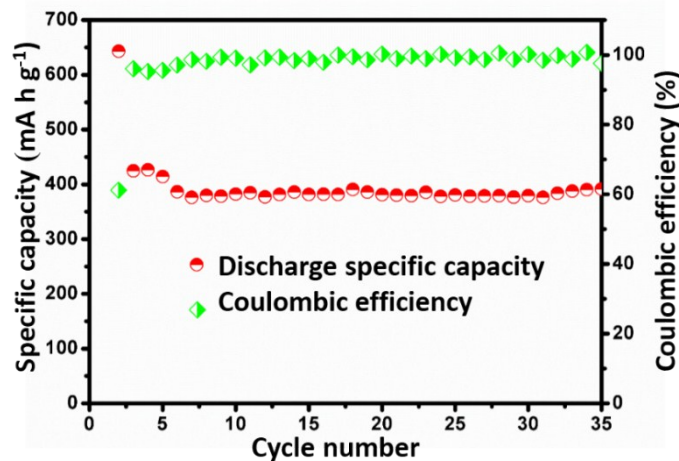

Fig. S15 Cycling performance and coulombic efficiency of SnO<sub>2</sub>@NC-1.2 at a current density of 200 mA g<sup>-1</sup>.

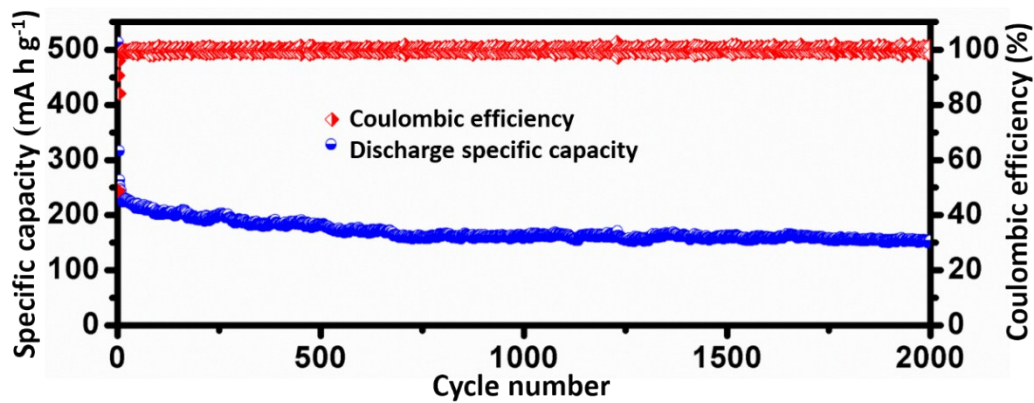

Fig. S16 Cycling performance and coulombic efficiency of SnO<sub>2</sub>@NC-1.2 at a current density of 2000 mA g<sup>-1</sup>. (The electrode was activated at a current density of 50 mA g<sup>-1</sup> for the first three cycles.)

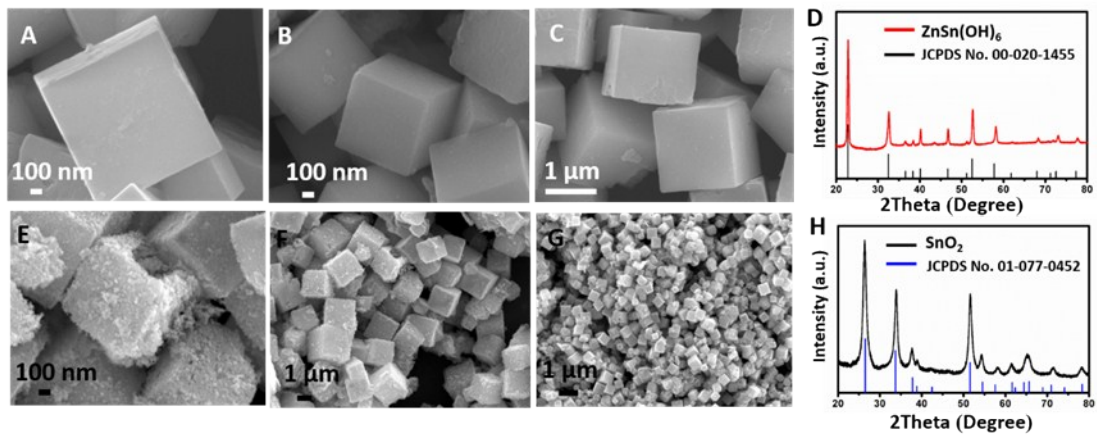

Fig. S17 (A, B, C) SEM images and (D) XRD pattern of  $\text{ZnSn(OH)}_6$ , (E, F, G) SEM images and (H) XRD pattern of the obtained  $\text{SnO}_2$ .

Table S2. Summary of the representative SnO<sub>2</sub>-based anode materials for SIBs.

| Materials                                                                                  | SnO <sub>2</sub> content<br>wt.% | R <sub>low</sub> <sup>a)</sup><br>mA h g <sup>-1</sup> /A g <sup>-1</sup> | R <sub>high</sub> <sup>b)</sup><br>mA h g <sup>-1</sup> /A g <sup>-1</sup> | C <sup>c)</sup><br>mA h g <sup>-1</sup> /A g <sup>-1</sup> /cycle | Ref              |
|--------------------------------------------------------------------------------------------|----------------------------------|---------------------------------------------------------------------------|----------------------------------------------------------------------------|-------------------------------------------------------------------|------------------|
| SnO <sub>2</sub> /nitrogen-doped graphene                                                  | 47                               | 339/0.02                                                                  | 170/0.64                                                                   | 246/0.08/100                                                      | 1                |
| Amorphous SnO <sub>2</sub> /graphene aerogel                                               | 50.7                             | 576.2/0.05                                                                | 84.4/0.8                                                                   | 380.2/0.05/100                                                    | 2                |
| SnO <sub>2</sub> /CNT                                                                      | 72                               | 630.4/0.1                                                                 | 324.1/1.6                                                                  | 223.2/1.6/300                                                     | 3                |
| SnO <sub>2</sub> /graphene                                                                 | 80                               | 512/0.05                                                                  | 34/0.5                                                                     | 220/0.1/100                                                       | 4                |
| SnO <sub>2</sub> -Graphene DualAerogel                                                     | 70                               | 448/0.05                                                                  | 184/1                                                                      | 221/0.2/200                                                       | 5                |
| SnO <sub>2</sub> @3D graphene                                                              | 71.5                             | 551/0.05                                                                  | 210/0.8                                                                    | 432/0.1/200                                                       | 6                |
| Mesoporous NiO/SnO <sub>2</sub> @rGO                                                       | 74.6                             | No data                                                                   | No data                                                                    | 254.8/0.05/40                                                     | 7                |
| Triple-walled SnO <sub>2</sub> @N-doped carbon@SnO <sub>2</sub> nanotubes                  | 70.4                             | 586/0.025                                                                 | 320/0.4                                                                    | 492/0.025/50                                                      | 8                |
| SnO <sub>2</sub> -carbon                                                                   | 60                               | 459/0.08                                                                  | 133/5.12                                                                   | 371/0.08/200                                                      | 9                |
| Ultrafine SnO <sub>2</sub> -RGO                                                            | 76.4                             | 480/0.05                                                                  | 125/1                                                                      | 330/0.1/150                                                       | 10               |
| Carbon/SnO <sub>2</sub> /carbon cloth                                                      | No data                          | 501/0.134                                                                 | 394/6.7                                                                    | 314/0.134/100                                                     | 11               |
| Al <sub>2</sub> O <sub>3</sub> /SnO <sub>2</sub> /carbon cloth                             | No data                          | 455/0.134                                                                 | 245/6.7                                                                    | 377/0.134/100                                                     | 11               |
| Mesoporous Sn/SnO <sub>2</sub>                                                             | No data                          | 500/0.05                                                                  | 209.8/1                                                                    | 372.3/0.05/50                                                     | 12               |
| Hollow SnO <sub>2</sub> /SnS <sub>2</sub>                                                  | No data                          | 497.8/0.3                                                                 | 245.4/2.5                                                                  | 485.6/0.3/100                                                     | 13               |
| Sn <sub>2</sub> Nb <sub>2</sub> O <sub>7</sub> /SnO <sub>2</sub> @3D carbon nanocomposites | 60.38                            | 302/0.1                                                                   | 135/5                                                                      | 210/1/500<br>300/0.1/100                                          | 14               |
| SnO <sub>2</sub> /3D graphene                                                              | 75                               | 321/0.08                                                                  | 266/1.2                                                                    | 223/0.08/350                                                      | 15               |
| <b>Mesoporous ultrafine SnO<sub>2</sub>@N-doped carbon</b>                                 | <b>76.4</b>                      | <b>560/0.05</b>                                                           | <b>236/2<br/>180/5</b>                                                     | <b>255.4/1/1000<br/>385/0.2/35</b>                                | <b>This work</b> |

a) Rate performance at low current density; b) rate performance at high current density; c) cycling performance.

## References

1. X. Xie, D. Su, J. Zhang, S. Chen, A. K. Mondal and G. Wang, *Nanoscale*, 2015, **7**, 3164-3172.
2. L. Fan, X. Li, B. Yan, J. Feng, D. Xiong, D. Li, L. Gu, Y. Wen, S. Lawes and X. Sun, *Adv. Energy Mater.*, 2016, **6**, 1502057.
3. J. Cui, Z. Xu, S. Yao, J. Huang, J. Huang, S. Abouali, M. A. Garakani, X. Ning and J. Kim, *J. Mater. Chem. A*, 2016, **4**, 10964-10973.
4. H. Lai, B. Feng, Y. Jiang, N. Shi, C. Liang, S. Chang, S. Guo, B. Cui and H. Cao, *Mater. Lett.*, 2016, **166**, 292-295.
5. Z. Li, J. Ding, H. Wang, K. Cui, T. Stephenson, D. Karpuzov and D. Mitlin, *Nano Energy*, 2015, **15**, 369-378.
6. L. Pei, Q. Jin, Z. Zhu, Q. Zhao, J. Liang and J. Chen, *Nano Res.*, 2014, **8**, 184-192.
7. Y. He, A. Li, C. Dong, C. Li and L. Xu, *Chem. Eur. J.*, 2017, **23**, 13724-13733.
8. J. Yue, W. Wang, N. Wang, X. Yang, J. Feng, J. Yang and Y. Qian, *J. Mater. Chem. A*, 2015, **3**, 23194-23200.
9. J. Ding, Z. Li, H. Wang, K. Cui, A. Kohandehghan, X. Tan, D. Karpuzov and D. Mitlin, *J. Mater. Chem. A*, 2015, **3**, 7100-7111.
10. Y. Wang, Y. Lim, M. Park, S. Chou, J. Kim, H. Liu, S. Dou and Y. Kim, *J. Mater. Chem. A*, 2014, **2**, 529-534.
11. Y. Liu, X. Fang, M. Ge, J. Rong, C. Shen, A. Zhang, H. A. Enaya and C. Zhou, *Nano Energy*, 2015, **16**, 399-407.
12. D. Tang, Q. Huang, R. Yi, F. Dai, M. L. Gordin, S. Hu, S. Chen, Z. Yu, H. Sohn, J. Song and D. Wang, *Eur. J. Inorg. Chem.*, 2016, **13-14**, 1950-1954.
13. K. Wang, Y. Huang, X. Qin, M. Wang, X. Sun and M. Yu, *ChemElectroChem*, 2017, **4**, 1-7.
14. P. Zhai, J. Qin, L. Guo, N. Zhao, C. Shi, E. Liu, F. He, L. Ma, J. Li and C. He, *J. Mater. Chem. A*, 2017, **5**, 13052-13061.
15. J. Lee, J. Song, Y. Cha, S. Fu, C. Zhu, X. Li, Y. Lin and M. Song, *Nano Res.*, 2017, 1-17.
